# Supplementary material for: Microbiota and Serum Metabolic Profile Changes in Korean Native Hanwoo Steer in Response to Diet Feeding Systems
Source: MDPI journal article supplement (doi:10.3390/ijms232012391), 2022-10-16
Supplement: s1 [file s1]

## **Microbiota and Serum Metabolic Profile Changes in Korean Native Hanwoo Steer in Response to Diets Feeding System**

Jeong Sung Jung <sup>1</sup>, Ilavenil Soundharrajan <sup>1</sup>, Dahye Kim <sup>2</sup>, Myunggi Baik <sup>3</sup>, Seungmin Ha <sup>4</sup> and Ki Choon Choi <sup>1,\*</sup>

1 Grassland and Forage Division, National Institute of Animal Science, Rural Development Administration, Cheonan 31000, Korea

2 Animal Genomics and Bioinformatics Division, National Institute of Animal Science, Wanju 55365, Korea

3 Department of Agricultural Biotechnology and Research Institute of Agriculture and Life Sciences, College of Agriculture and Life Sciences, Seoul National University, Seoul 08826, Korea

4 Dairy Science Division, National Institute of Animal Science, Rural Development Administration, Cheonan 31000, Korea

\* Correspondence: choiwh@korea.kr; Tel.: +82-41-580-6752; Fax: +82-41-580-6779

**Supplementary Table S1.** Effects of feeding systems on Grazing on growth performance and feed intake in Hanwoo steers during growing period.

| Items                                | Total period         |          |       |      |
|--------------------------------------|----------------------|----------|-------|------|
|                                      | Control<br>(Housing) | Grazing  | SEM   | Pr>F |
| Initial body weight (kg)             | 260.80               | 219.80   | 14.70 | 0.16 |
| Final body weight (kg)               | 376.40               | 415.00   | 11.50 | 0.26 |
| Average daily gain (ADG, kg)         | 0.81                 | 0.83     | 0.03  | 0.22 |
| Feed intake (kg)                     | 7.80                 | 8.22     | 0.20  | 0.09 |
| Concentrate (kg)                     | 3.95                 | 3.03     | 0.18  | 0.01 |
| Rice straw (kg)                      | 3.85                 | -        | 0.07  | -    |
| Grass/grazing (kg)                   | -                    | 5.19     | 0.22  | -    |
| Feed efficiency                      | 0.11                 | 0.09     | 0.01  | 0.03 |
| Feed conversion ration               | 9.63                 | 11.10    | 0.62  | 0.02 |
| Intake(kg)                           |                      |          |       |      |
| Crude protein                        | 152.14               | 282.82   | 22.48 | 0.01 |
| Total digestibility nutrients ( TDN) | 932.87               | 1,173.05 | 46.94 | 0.01 |

SEM: Standard error of Mean

**Supplementary Table S2.** Ingredient composition and chemical analysis of nutrients.

| Items                               | Compositions (% DM) |
|-------------------------------------|---------------------|
| <b><i>Ingredients</i></b>           |                     |
| Cornflake                           | 25                  |
| Wheat                               | 18                  |
| Gluten feed                         | 8                   |
| Tapioca residue                     | 4.58                |
| Wheat bran                          | 11.79               |
| Palm kernel meal                    | 8                   |
| Coconut oil meal                    | 3                   |
| Rapeseed meal                       | 5                   |
| Soybean meal                        | 7.39                |
| disillers dried grains              | 2.22                |
| Limestone                           | 2.17                |
| Molasses                            | 3                   |
| Salt                                | 0.81                |
| Probiotics                          | 0.05                |
| Magnesium oxide                     | 0.3                 |
| Sodium bicarbonate                  | 0.3                 |
| Vitamin premix <sup>a</sup>         | 0.21                |
| Mineral premix <sup>b</sup>         | 0.18                |
| Total                               | 100                 |
| <b><i>Chemical compositions</i></b> |                     |
| Dry matter (DM)                     | 88.23               |
| Crude protein (CP)                  | 16.36               |
| Ether extract                       | 11.25               |
| Crude fiber                         | 26.78               |
| Acid detergent fiber (ADF)          | 22.5                |
| Neutral detergent fiber (NDF)       | 35.50               |
| Total digestible nutrient (TDN)     | 74.68               |

<sup>a</sup>Vitamin premix contained the following ingredients diluted in cellulose (g/kg premix): L-ascorbic acid, 121.2; DL- $\alpha$ -tocopherol acetate, 18.8; thiamine hydrochloride, 2.7; riboflavin, 9.1; pyridoxine hydrochloride, 1.8; niacin, 36.4; Ca-D-pantothenate, 12.7; myoinositol, 181.8; D-biotin, 0.27; folic acid, 0.68; p-aminobenzoic acid, 18.2; menadione, 1.8; retinal acetate, 0.73; cholecalciferol, 0.003; cyanocobalamin, 0.003. <sup>b</sup>Mineral premix contained the following ingredients (g/kg premix): Mg SO<sub>4</sub> 7H<sub>2</sub>O, 80.0; NaH<sub>2</sub>PO<sub>4</sub> 2H<sub>2</sub>O, 370.0; KCl, 130.0; ferric citrate, 40.0; ZnSO<sub>4</sub> 7H<sub>2</sub>O, 20.0; Ca-lactate, 356.5; CuCl, 0.2; AlCl<sub>3</sub> 6H<sub>2</sub>O, 0.15; KI, 0.15; Na<sub>2</sub>Se2O<sub>3</sub>, 0.01; MnSO<sub>4</sub> H<sub>2</sub>O, 2.0; CoCl<sub>2</sub> 6H<sub>2</sub>O, 1.0. Concentrate feed was provided by NongHyup Company. <sup>c</sup>Vitamin premix contained the following ingredients (Power Vitamine, Genobio, Republic of Korea) : Vitamin A, 6,000,000IU; Vitamin D3, 1,200,000 IU; Vitamin E, 1,000mg; Vitamin B1, 500mg; Vitamin B2,

500mg; Vitamin B6, 500mg; Vitamin B12, 10mg; Protected Vitamin C, 5,000mg; Pantothenic acid, 1,000mg; Niacin, 1,000mg; Biotin, 30mg; Folic acid, 600mg; Mn, 100mg.

**Supplementary Table S3.** Nutrient compositions of rice straw and grass during growing period

| Item (% DM) | Rice straw | Grass/Grazing |            |            |            |            |            |            |
|-------------|------------|---------------|------------|------------|------------|------------|------------|------------|
|             |            | May           | Jun.       | Jul.       | Aug.       | Sep.       | Oct.       | Nov        |
| DM          | 88.82±0.36 | 22.50±2.04    | 30.00±4.02 | 34.66±2.94 | 31.32±0.17 | 27.32±0.82 | 29.73±0.29 | 30.02±0.44 |
| CP          | 4.45±0.02  | 12.37±0.47    | 12.05±1.08 | 14.51±0.04 | 13.57±0.47 | 18.60±0.27 | 15.37±0.42 | 15.63±0.49 |
| ADF         | 42.20±0.22 | 30.61±0.70    | 39.47±1.06 | 40.24±0.14 | 41.48±0.58 | 38.43±0.49 | 35.07±0.39 | 32.95±0.79 |
| NDF         | 68.99±0.08 | 54.22±0.04    | 64.32±0.72 | 61.29±1.24 | 60.57±0.85 | 60.04±0.87 | 57.26±0.36 | 55.68±0.72 |
| TDN         | 55.56±0.17 | 64.72±0.55    | 57.72±0.84 | 57.11±0.11 | 56.13±0.46 | 58.54±0.39 | 61.19±0.31 | 62.87±0.63 |
| IVDMD       | 40.07±0.87 | 75.58±1.28    | 70.62±2.38 | 71.19±0.61 | 71.39±0.56 | 73.18±0.65 | 74.56±0.57 | 74.70±0.74 |

DM: Dry matter, CP: crude protein, AFD: Acid detergent fiber , NDF: Neutral detergent fiber, TDN: Total digestible nutrient, IVDMD: In vitro dry matter digestibility

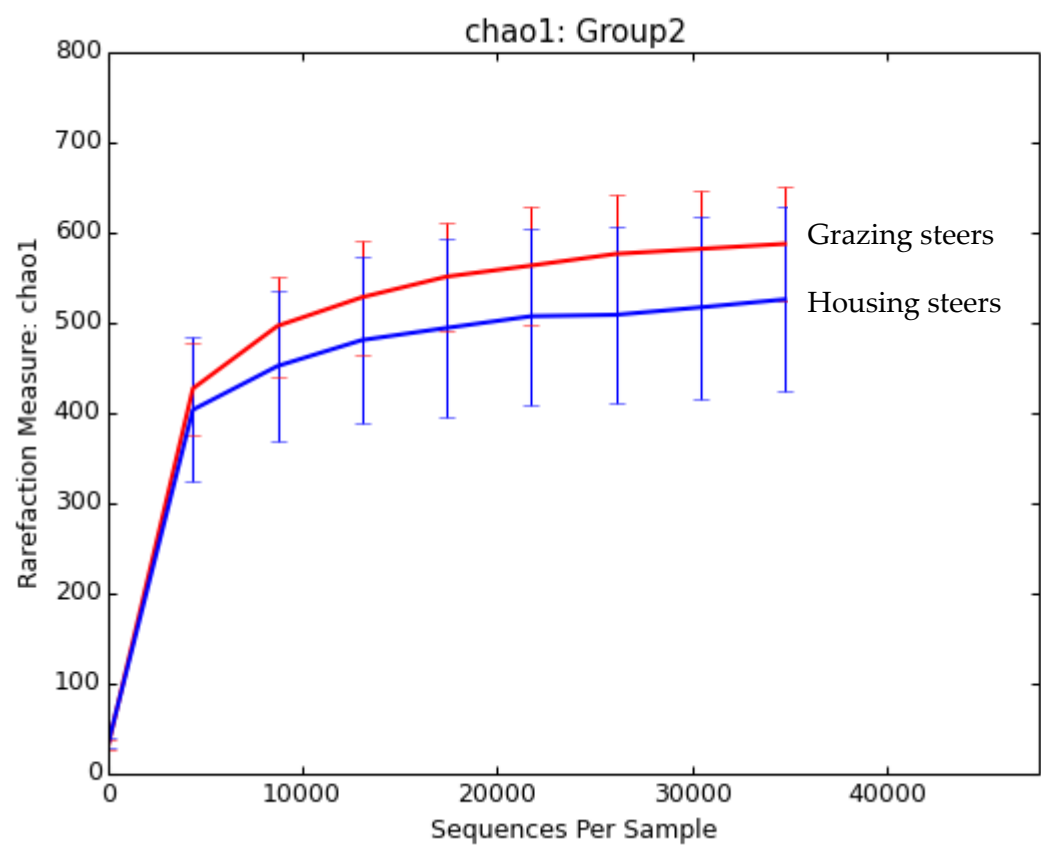

**Supplementary Figure S1.** A rarefaction analysis of the fecal microbiota of grazing and housing steers
